# Supplementary material for: Adherence and long-term growth outcomes: results from the easypod™ connect observational study (ECOS) in paediatric patients with growth disorders
Source: PubMed Central journal article supplement (PMC6107763; doi:10.1530/ec-18-0172), 2018-07-05
Supplement: ec-7-914-t001.pdf [file ec-7-914-t001.pdf]

**Easypod™ Connect Observational Study (ECOS) local ethical committees**

| <b>Country</b>   | <b>Site Number</b> | <b>Date of Protocol Approval</b> | <b>Local Ethical Committee</b>                                                                                                                                         |
|------------------|--------------------|----------------------------------|------------------------------------------------------------------------------------------------------------------------------------------------------------------------|
| <b>Argentina</b> | 171                | 06 June 2012                     | Comité independiente de ética para Ensayos en Farmacología Clínica,                                                                                                    |
|                  | 359                | 11 February 2014                 | Comité independiente de ética para Ensayos en Farmacología Clínica                                                                                                     |
| <b>Australia</b> | 020                | 24 December 2010                 | Maters Health Services Human Research Ethics Committee                                                                                                                 |
|                  | 021                | 14 February 2011                 | Austin Health Human Research Ethics Committee                                                                                                                          |
|                  | 022                | 1 February 2011                  | ACT Health Human Research Ethics Committee.                                                                                                                            |
|                  | 025                | 28 March 2011                    | Monash Health Human Research Ethics Committee                                                                                                                          |
|                  | 036                | 24 May 2011                      | Princess Margaret Hospital for Children Ethics Committee                                                                                                               |
| <b>Austria</b>   | 018/023/026        | 21 December 2010                 | Single approval for all sites by EC. EC of the medical University Vienna and of the general hospital of the city Vienna<br>AKH Borschkegasse 8b / E06<br>A-1090 Vienna |
| <b>Canada</b>    | 024                | 06 April 2011                    | UBC C&W Research Ethics Board                                                                                                                                          |
|                  | 017                | 06 January 2011                  | University of Western, Office of Research Ethics Board HSREB                                                                                                           |
|                  | 008                | 07 January 2011                  | Comite d'éthique du CHU Sainte-Justine                                                                                                                                 |
|                  | 185                | 09 May 2012                      | Service de soutien à l'éthique de la recherche en santé sur l'humain<br>Centre hospitalier universitaire de Sherbrooke                                                 |
|                  | 120                | 24 October 2011                  | Health Research Ethics Board                                                                                                                                           |
|                  | 010                | 13 June 2011                     | SickKids – Research Ethics Board                                                                                                                                       |
|                  | 287                | 22 March 2013                    | Health Research Ethics Board – University of Manitoba                                                                                                                  |
|                  | 009                | 18 November 2010                 | Conjoint Health Research Ethics Board – University of Calgary                                                                                                          |
|                  | 272                | 30 April 2012                    | Horizon Health Network – Research Ethics Board                                                                                                                         |
|                  | 019                | 25 February 2011                 | Hamilton Integrated Research Ethics Board – McMaster University                                                                                                        |
| <b>China</b>     | 071                | 13 September 2011                | EC of the first affiliated hospital, Sun Yat-sen University                                                                                                            |
|                  | 072                | 09 August 2011                   | EC of Beijing Children's Hospital, capital medical university                                                                                                          |
|                  | 073                | 09 August 2011                   | Ethics Committee of Peking Union Medical College Hospital                                                                                                              |
|                  | 074                | 13 October 2011                  | Ethics Committee of Chengdu Women & Children's Central Hospital                                                                                                        |
|                  | 103                | 12 October 2011                  | Ethics Committee of Fujian                                                                                                                                             |

|                       |                                                  |                  |                                                                                                                                                                                 |
|-----------------------|--------------------------------------------------|------------------|---------------------------------------------------------------------------------------------------------------------------------------------------------------------------------|
|                       |                                                  |                  | province, Fuzhou Children's Hospital                                                                                                                                            |
|                       | 104                                              | 30 November 2011 | Ethics Committee of Sun Yat-sen Memorial Hospital Sun Yat-sen University                                                                                                        |
|                       | 105                                              | 03 November 2011 | Ethics Committee of Children's Hospital of Fudan University                                                                                                                     |
| <b>Columbia</b>       | 361                                              | 20 November 2013 | Hospital San Jose Ethics Committee                                                                                                                                              |
|                       | 362                                              | 30 April 2014    | Fundación Cardio Infantil Ethics Committees                                                                                                                                     |
| <b>Czech Republic</b> | 050                                              | 29 June 2011     | Etická komise FN Motol<br>V Úvalu 84, Praha 5, 150 06                                                                                                                           |
|                       | 048                                              | 10 June 2011     | Etická komise, Krajská zdravotní, a.s.<br>- Masarykova nemocnice v Ústí nad Labem, o.z.<br>Sociální péče 3316/12A,<br>401 13 Ústí nad Labem                                     |
|                       | 047                                              | 11 July 2011     | Etická komise FN a LF UP Olomouc<br>I. P. Pavlova 185/6<br>779 00 Olomouc                                                                                                       |
|                       | 049                                              | 23 June 2011     | Etická komise Endokrinologického ústavu<br>Národní 8, 116 94 Praha 1                                                                                                            |
|                       | 292                                              | 09 February 2012 | Etická komise FN Plzeň<br>E. Beneše 13, 305 99 Plzeň                                                                                                                            |
|                       | 046                                              | 24 August 2011   | Etická komise FN Brno<br>Jihlavská 20, 625 00 Brno                                                                                                                              |
|                       | 067                                              | 17 December 2012 | Etická komise FN Hradec Králové<br>Sokolská 581, 500 05 Hradec Králové                                                                                                          |
|                       | 143                                              | 01 February 2012 | Etická komise Fakultní nemocnice<br>Královské Vinohrady<br>Šrobárova 1150/50, Praha 10, 100 34                                                                                  |
| <b>Finland</b>        | 331                                              | 21 October 2013  | Helsingin Ja Uudenmaan (local EC at site level is not applicable – Central Ethics Approval                                                                                      |
| <b>France</b>         |                                                  |                  | CCTIRS (Comité Consultatif sur le Traitement de l'Information en Matière de Recherche dans le Domaine de la Santé).                                                             |
| <b>Greece</b>         | 085                                              | 02 February 2011 | Local institutional review board of Athens University Medical School                                                                                                            |
|                       | 249                                              | 28 April 2011    | Local institutional review board of "P.&A. Kyriakou" Children's Hospital                                                                                                        |
|                       | 252                                              | 28 April 2011    | Local institutional review board of "P.&A. Kyriakou" Children's Hospital                                                                                                        |
| <b>Hungary</b>        | 144, 145, 146, 151, 152, 156, 176, 177, 204, 275 | 19 January 2012  | Central Ethics - Egészségügyi Tudományos Tanács Tudományos és Kutatásetikai Bizottsága, ETT<br>TUKÉB (Scientific and Research Ethics Committee of the Medical Research Council) |
| <b>Indonesia</b>      | 371                                              | 22 April 2013    | Health Research Ethics Committee<br>Faculty of Medicine University of Indonesia and Cipto Mangunkusumo                                                                          |

|              |     |                  |                                                                                                                         |
|--------------|-----|------------------|-------------------------------------------------------------------------------------------------------------------------|
|              |     |                  | Hospital.                                                                                                               |
| <b>Italy</b> | 091 | 19 October 2011  | Comitato Etico della ASL di Cagliari                                                                                    |
|              | 140 | 19 January 2012  | Comitato Etico dell'Università Cattolica del Sacro Cuore - Policlinico Universitario Agostino Gemelli di Roma           |
|              | 092 | 14 December 2011 | Comitato Etico dell'Azienda Ospedaliera Santobono-Pausilipon di Napoli                                                  |
|              | 207 | 21 December 2011 | Comitato Etico dell'Azienda Ospedaliera Policlinico Consorziale di Bari                                                 |
|              | 138 | 21 December 2011 | Comitato Etico della ASL LE di Lecce                                                                                    |
|              | 093 | 29 November 2011 | Comitato di Etica dell'IRCCS Istituto Giannina Gaslini di Genova                                                        |
|              | 180 | 10 January 2012  | Comitato Etico dell'IRCCS Centro di Riferimento Oncologico di Basilicata di Rionero in Vulture (PZ)                     |
|              | 164 | 27 January 2012  | Comitato Etico dell'Azienda Ospedaliera Ospedali Riuniti Villa Sofia-Cervello di Palermo                                |
|              | 345 | 11 January 2012  | Comitato Etico per le Attività Biomediche Carlo Romano dell'Università degli Studi Federico II di Napoli                |
|              | 128 | 22 February 2012 | Comitato Etico per la Sperimentazione Clinica dei Medicinali dell'Azienda Ospedaliera Universitaria Integrata di Verona |
|              | 181 | 12 March         | Comitato Etico Per la Sperimentazione dell'Azienda Ospedaliera di Padova                                                |
|              | 183 | 24 January 2012  | Comitato Etico Unico per la Provincia di Parma                                                                          |
|              | 119 | 15 December 2011 | Comitato Etico dell'IRCCS Ospedale Casa Sollievo della Sofferenza di S. Giovanni Rotondo (FG)                           |
|              | 127 | 19 December 2011 | Comitato Etico per la Sperimentazione Clinica dell'IRCCS Ospedale Pediatrico Bambino Gesù di Roma                       |
|              | 141 | 23 January 2012  | Comitato Etico Scientifico dell'Azienda Ospedaliera Universitaria Policlinico Gaetano Martino di Messina                |
|              | 184 | 22 March 2012    | Comitato Etico della ASL 4 di Teramo                                                                                    |
|              | 187 | 26 April 2012    | Comitato Etico Sperimentazione Clinica Medicinali della AUSL 8 di Arezzo                                                |

|                                |                                   |                  |                                                                                                                           |
|--------------------------------|-----------------------------------|------------------|---------------------------------------------------------------------------------------------------------------------------|
|                                | 356                               | 17 December 2013 | Comitato Etico dell'Azienda Ospedaliero-Universitaria Ospedali Riuniti Umberto I-G.M. Lancisi-G.Salesi di Ancona          |
|                                | 322                               | 17 December 2013 | Comitato Etico per la Sperimentazione dei Farmaci dell' Azienda Ospedaliero-Universitaria A. Meyer di Firenze             |
|                                | 327                               | 19 June 2013     | Comitato Etico dell'Azienda Ospedaliera Policlinico Consorziale di Bari                                                   |
|                                | 333                               | 26 June 2013     | Comitato Etico Locale per la Sperimentazione Clinica dell' Azienda Ospedaliera L. Sacco di Milano                         |
|                                | 325                               | 08 July 2013     | Comitato Etico dell' Azienda Ospedaliera Universitaria Policlinico Paolo Giaccone dell' Università degli Studi di Palermo |
|                                | 332                               | 27 June 2013     | Comitato Etico dell'IRCCS Istituto Auxologico Italiano di Milano                                                          |
| <b>Kingdom of Saudi Arabia</b> | 368                               | 16 March 2014    | Institutional Review Board University of Dammam PO Box 2114 Dammam 31451 KSA                                              |
|                                | 351                               | 07 August 2014   | Institutional Review Board KFMC P.O. Box 59046 Riyadh 11525 Kingdom of Saudi Arabia                                       |
| <b>Korea</b>                   | 015                               | 30 November 2010 | Severance Hospital Yonsei university health system Institutional Review Board                                             |
|                                | 016                               | 21 October 2010  | Institutional Review Board of Ajou University Hospital                                                                    |
|                                | 040                               | 28 July 2011     | Chonnam National University Hospital Institutional Review Board                                                           |
|                                | 041                               | 13 June 2011     | Institutional Review Board of Inje university Pusan Paik hospital                                                         |
|                                | 042                               | 28 June 2011     | Asan Medical Center Institutional Review Board                                                                            |
|                                | 045                               | 08 August 2011   | Korea University Anam Hospital Clinical Trial Center Institutional Review Board                                           |
|                                | 043                               | 10 June 2011     | Kyungpook national University Hospital Institutional Review Board                                                         |
|                                | 070                               | 07 November 2011 | The Catholic University of Korea Seoul ST. Mary's Hospital Institutional Review Board                                     |
|                                | 044                               | 27 July 2011     | Chungbuk national university hospital Institutional Review Board                                                          |
| <b>Mexico</b>                  | 131,                              | 06 March 2012    | Comite Bioetico para la Investigacion Clinica S.C.                                                                        |
|                                | 132, 133, 134, 135, 136, 165, 166 | 14 February 2012 | Comite Bioetico para la Investigacion Clinica S.C.                                                                        |

|                             |           |                  |                                                                                                |
|-----------------------------|-----------|------------------|------------------------------------------------------------------------------------------------|
| <b>Norway</b>               | All sites | 12 May 2014      | The Regional Committees for Medical and Health Research Ethics (REK) – Central Ethics Approval |
| <b>Singapore</b>            | 375       | 17 June 2014     | SingHealth Centralised Institutional Review Board                                              |
|                             | 376       | 23 May 2014      | NHG Domain specific review board                                                               |
| <b>Slovakia</b>             | All sites | 14 September     | Etická komisia DFNSPCentral Ethics Approval                                                    |
| <b>Spain</b>                | 190       | 4 July 2011      | Hospital General Universitario Gregorio Marañón Ethics Board                                   |
|                             | 120000985 | 24 April 2013    | Hospital Universitario De Girona Ethics Board                                                  |
| <b>Sweden</b>               | 028       | 24 October 2010  | EPN - Regionala Etikprövningsnämnden i Stockholm – Central Ethics Approval                     |
| <b>Taiwan</b>               | 343       | 26 November 2013 | Institutional Review Board of Kaohsiung Medical University Hospital                            |
|                             | 344       | 25 December 2013 | Taipei Medical University Joint Institutional Review Board                                     |
| <b>United Arab Emirates</b> | 349       | 01 April 2014    | Ethics and Research Committee Mafraq Hospital                                                  |
| <b>United Kingdom</b>       | All sites |                  | Ethics approval not required                                                                   |
